# Supplementary material for: Social media for palliative and end-of-life care research: a systematic review
Source: PubMed Central journal article supplement (PMC11103321; doi:10.1136/spcare-2023-004579), 2024-04-09
Supplement: spcare-2023-004579supp001.pdf [file spcare-2023-004579supp001.pdf]

## Supplemental file 1. Search strategy June 2020-December 2022

**Ovid (including Embase, Medline, PsycInfo, Global Health) 2022-12-30**

- #1 (social media or social web or social network or web2 or web-based or twitter or tweet\* or youtube or linkedin or instagram or reddit or weibo or wechat or online forum\* or online community or pinterest or tumblr or tiktok or Patientslikeme or blog).mp.
- #2 "web 2.0".mp.
- #3 (palliative\* or hospice or end of life or EoL\* or PEoL\* or terminal care or terminal ill\* or advance care or marie curie nurse or macmillan nurse or comfort care or supportive care or bereavement care or respite care or pain management or symptom management or pain control).mp.
- #4 1 or 2
- #5 3 and 4

---

'multi-purpose' (.mp.) fields for: ti,bt,ab,ot,nm,hw,fx,kf,ox,px,rx,ui,sy,ux,mx.

**Web of Science Core Collection 2022-12-30**

- #1 ((TS=(social media or social web or social network or "web 2.0" or (web2 or web-based) or (twitter or tweet\* or youtube or linkedin or instagram or reddit or weibo or wechat or online forum\* or online community or pinterest or tumblr or tiktok or Patientslikeme or blog))) AND TS=((palliative\* or hospice or end of life or EoL\* or PEoL\* or terminal care or terminal ill\* or advance care or marie curie nurse or macmillan nurse or comfort care or supportive care or bereavement care or respite care or pain management or symptom management or pain control)))

---

"Topic" (TS) fields for: Title, Abstract, Author Keywords, Keywords Plus.

**CNKI 2022-12-30**

- #1 (TI,AB=(社交媒体+社交网络+微博+微信+推特+抖音+博客)\*(姑息治疗+安宁疗护+舒缓医疗+缓和医疗+和缓医疗+临终关怀+姑息医学+安宁医疗+舒缓医学+安宁病房+预立医疗+预先医疗+医学预嘱+疼痛管理+疼痛控制+症状管理))

**OpenGrey 2020-06-09 (through website)**

- #1 ((social media or social web or social network or "web 2.0" or (web2 or web-based) or (twitter or tweet\* or youtube or linkedin or instagram or reddit or weibo or wechat or online forum\* or online community or pinterest or tumblr or tiktok or Patientslikeme or blog)) AND (palliative\* or hospice or end of life or EoL\* or PEoL\* or terminal care or terminal ill\* or advance care or marie curie nurse or macmillan nurse or comfort care or supportive care or

bereavement care or respite care or pain management or symptom  
management or pain control)

**OpenGrey 2022-12-30 (through MySQL database because the website is non-existent)**

```

SELECT *
FROM item
WHERE (title LIKE '%social media%' OR title LIKE '%social web%' OR title
LIKE '%social network%' OR title LIKE '%web 2.0%' OR title LIKE
'%web2%' OR title LIKE '%web-based%' OR title LIKE '%twitter%' OR title
LIKE '%tweet%' OR title LIKE '%youtube%' OR title LIKE '%linkedin%' OR
title LIKE '%instagram%' OR title LIKE '%reddit%' OR title LIKE '%weibo%'
OR title LIKE '%wechat%' OR title LIKE '%online forum%' OR title LIKE
'%online community%' OR title LIKE '%pinterest%' OR title LIKE
#1 '%tumblr%' OR title LIKE '%tiktok%' OR title LIKE '%patientslikeme%' OR
title LIKE '%blog%')
AND (title LIKE '%palliative%' OR title LIKE '%hospice%' OR title LIKE
'%end of life%' OR title LIKE '%EoL%' OR title LIKE '%terminal care%' OR
title LIKE '%terminal ill%' OR title LIKE '%advance care%' OR title LIKE
'%marie curie nurse%' OR title LIKE '%macmillan nurse%' OR title LIKE
'%comfort care%' OR title LIKE '%supportive care%' OR title LIKE
'%bereavement care%' OR title LIKE '%respite care%' OR title LIKE '%pain
management%' OR title LIKE '%symptom management%' OR title LIKE
'%pain control%');

```

**CareSearch 2022-12-30**

```

((((((((((((((((("social media"[Abstract]) OR "social web"[Abstract]) OR
"social network"[Abstract]) OR "web 2.0"[Abstract]) OR web2[Abstract]) OR
web-based[Abstract]) OR twitter[Abstract]) OR tweet[Abstract]) OR
#1 youtube[Abstract]) OR linkedin[Abstract]) OR instagram[Abstract]) OR
reddit[Abstract]) OR weibo[Abstract]) OR wechat[Abstract]) OR "online
forum"[Abstract]) OR "online community"[Abstract]) OR pinterest[Abstract])
OR tumblr[Abstract]) OR tiktok[Abstract]) OR Patientslikeme[Abstract]) OR
blog[Abstract], Type: Research Studies

```
